# Supplementary material for: Development of ssDNA aptamers for the capture and detection of Salmonella typhimurium
Source: Royal Society of Chemistry journal article supplement (doi:10.1039/c4ay01035c), 2014-01-01
Supplement: c4ay01035c1.pdf [file c4ay01035c1.pdf]

**Electronic Supplementary Information**

(Paper Number: c4ay01035c)

**Manuscript title : Development of ssDNA aptamers for the capture and detection of *Salmonella typhimurium***

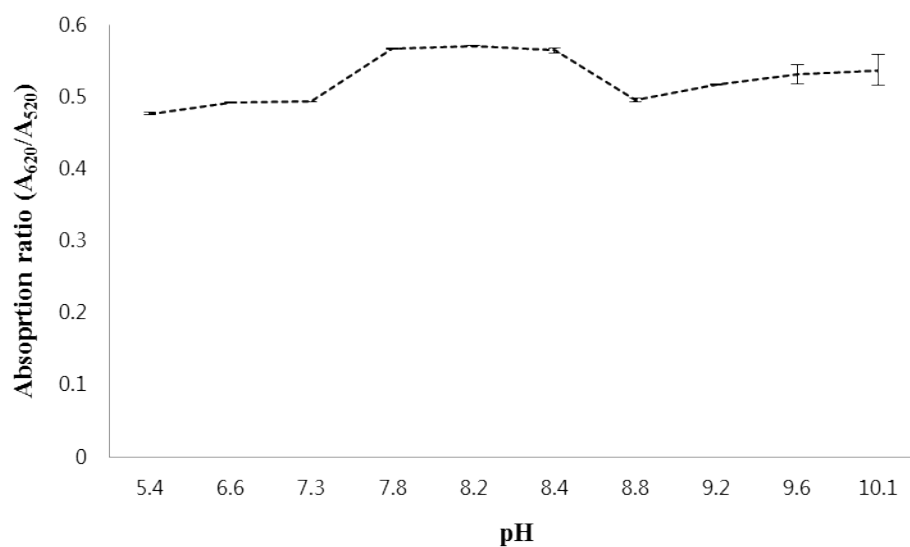

**Fig. S1.** Signal response of S6-nano Au toward various pH states.

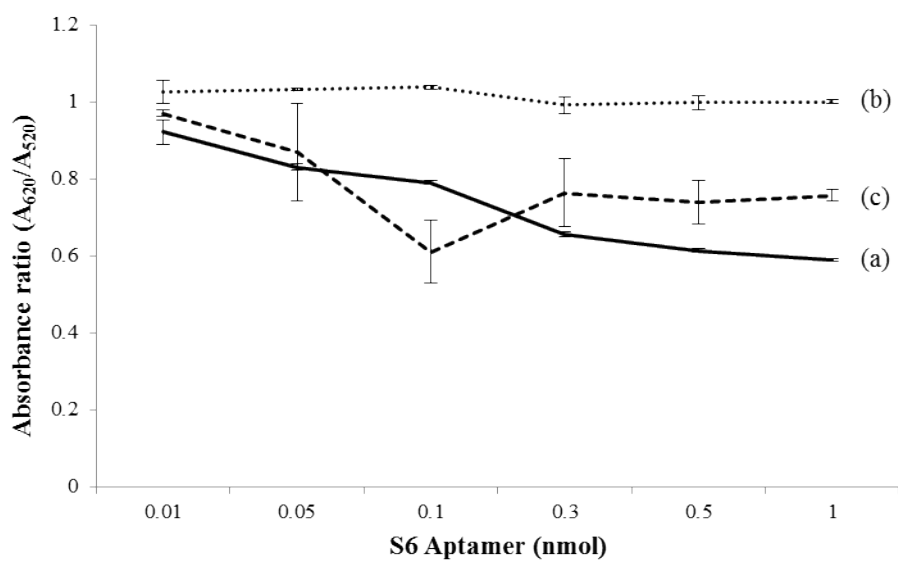

**Fig. S2.** Selectivity of the biosensor for *S. Typhimurium* detection using different concentrations of S6 aptamer to aggregate nano Au particles: (a) blank, (b) with *S. Typhimurium*  $1 \times 10^8$  cfu, (c) with *S. aureus*  $1 \times 10^8$  cfu

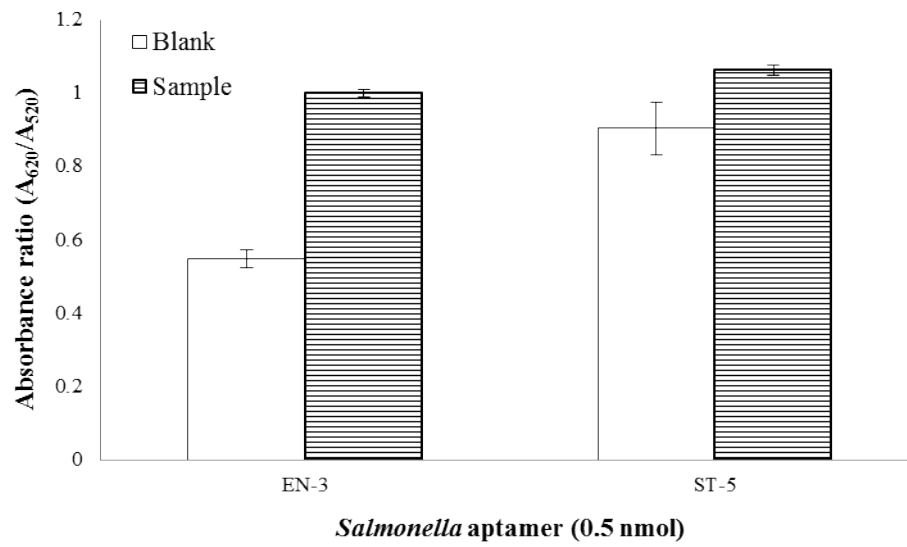

**Fig. S3.** Selectivity of the biosensor for *S. Typhimurium* detection using S6 aptamer to aggregate nano Au particles: square with blank is treated only buffers (which is blank), square with stripe pattern is treated with *S. Typhimurium*  $10^8$  cfu
